# Supplementary material for: Kinetics and isotype assessment of antibodies targeting the spike protein receptor‐binding domain of severe acute respiratory syndrome‐coronavirus‐2 in COVID‐19 patients as a function of age, biological sex and disease severity
Source: PubMed Central journal article supplement — Clin Transl Immunology. 2020 Oct 7;9(10):e1189. doi: 10.1002/cti2.1189 (PMC7541824; doi:10.1002/cti2.1189), 2020-10-07
Supplement: CTI2-9-e1189-s001.pdf [file CTI2-9-e1189-s001.pdf]

### Supplementary figures

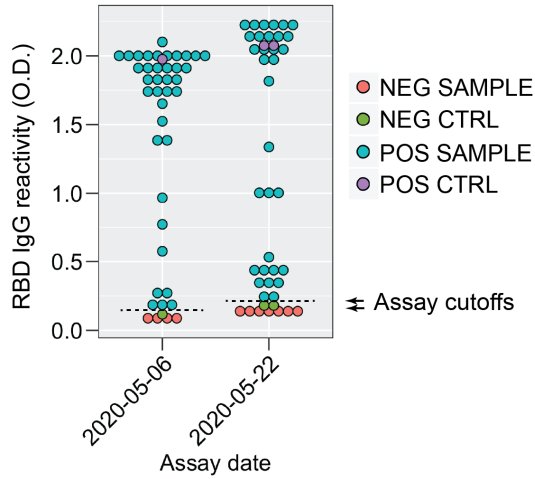

**Supplementary figure 1. Determination of RBD IgG reactivity by assay date.** Optical density (O.D.) at 405 nm with known positive and pre-2019 serum samples is presented.

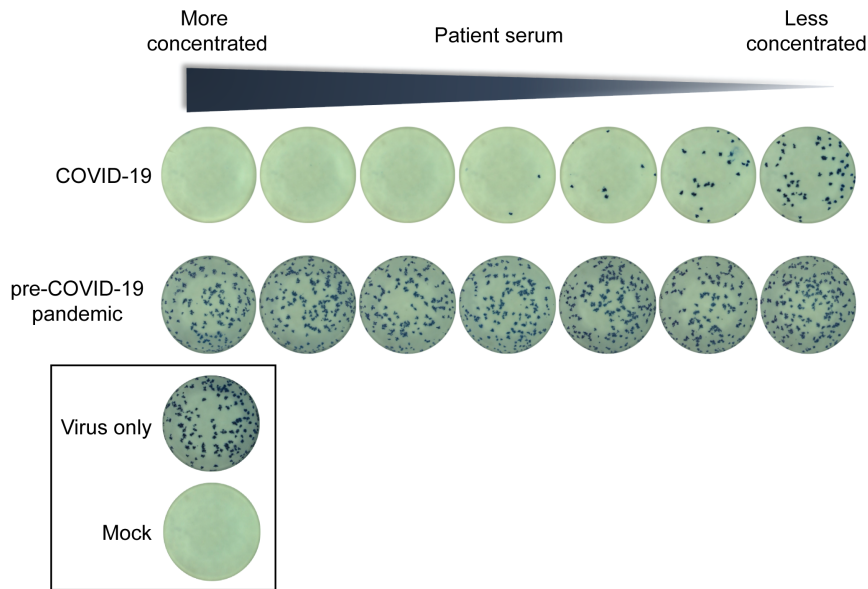

**Supplementary figure 2. Microneutralization of SARS-CoV-2.** Representative images of focus-based microneutralization of SARS-CoV-2/VA-1/2020 by COVID-19 serum, but not by pre-pandemic serum. Also included are mock infected and virus-only controls.

(a)

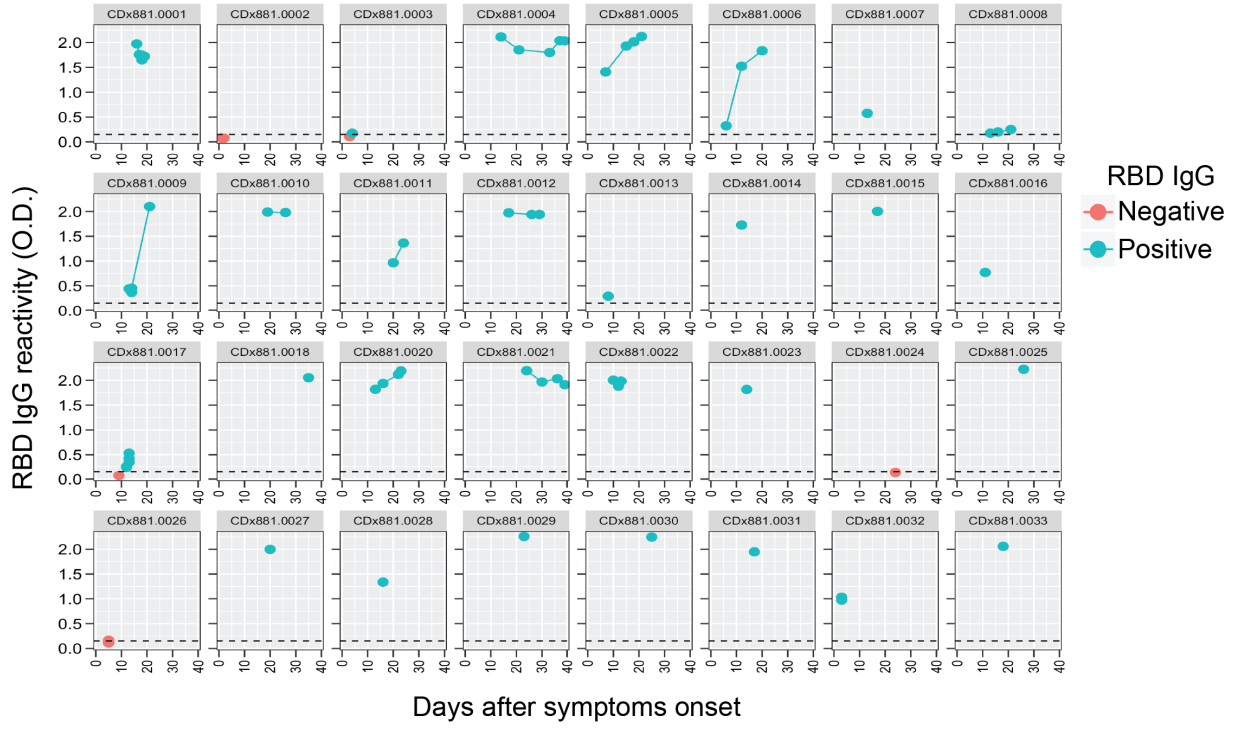

(b)

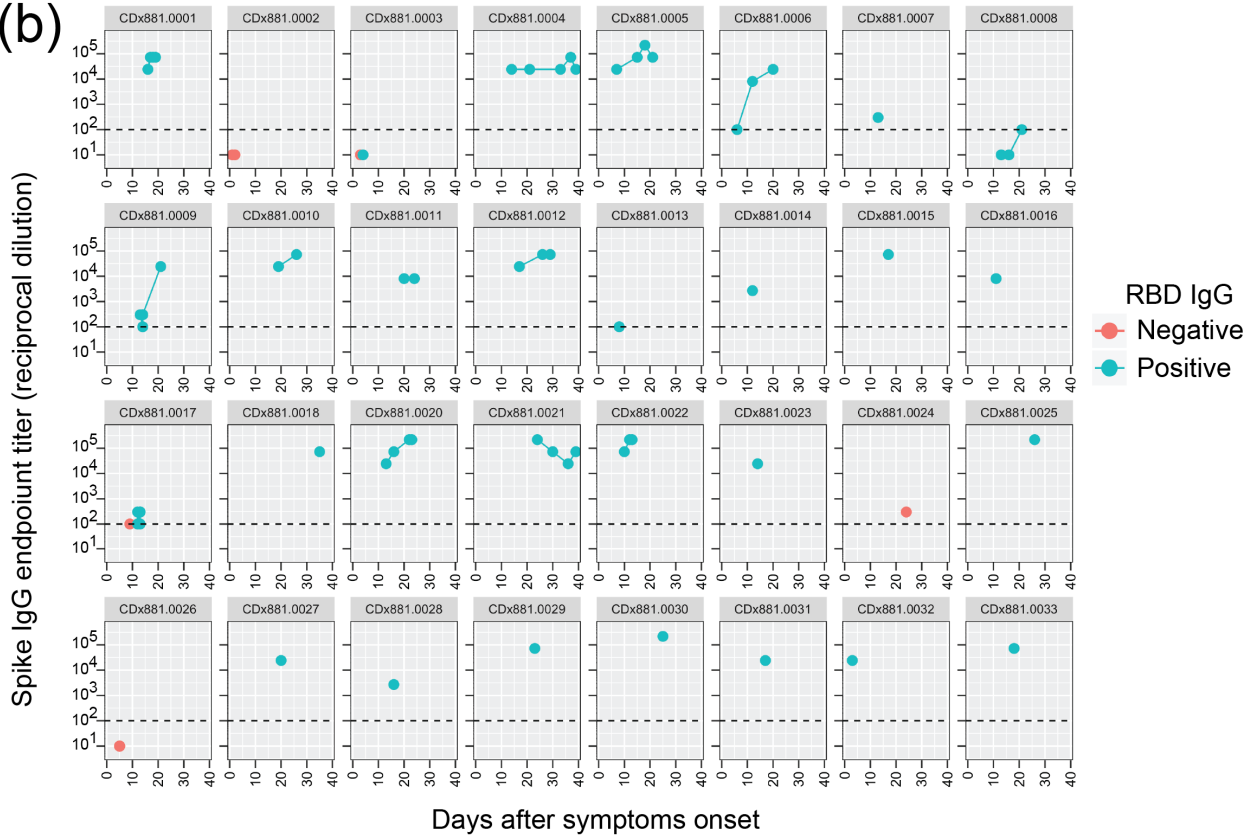

**Supplementary figure 3. | RBD-S and spike IgG responses in COVID-19 patients. (a)** RBD-IgG reactivity for each patient by timepoint after onset of symptoms was determined by ELISA. Values over threshold (indicated by dashed line) are indicated as RBD-S-positive and those under threshold as RBD-S-negative. **(b)** Patient-specific endpoint titers for spike IgG are plotted by day after symptoms onset and according to RBD-S IgG positivity by timepoint.

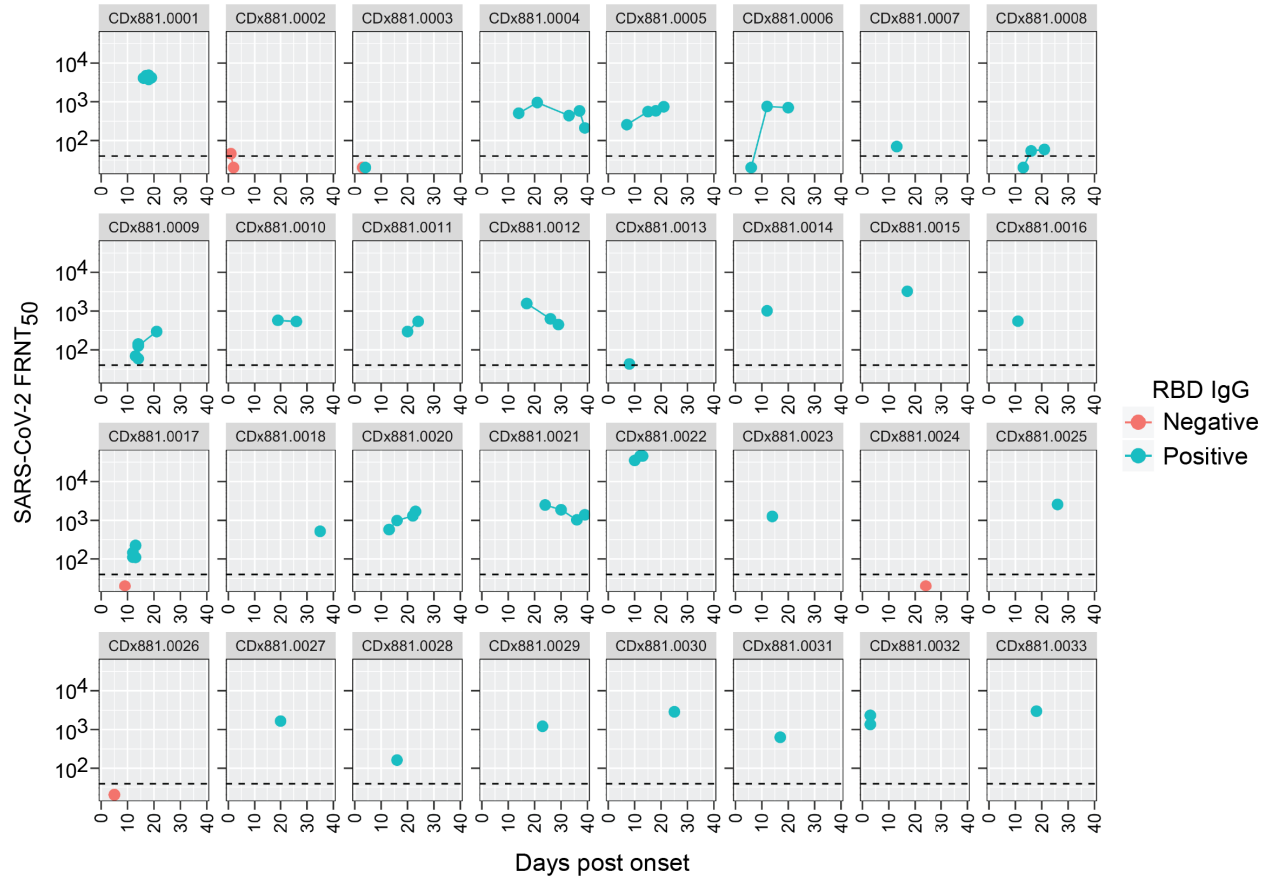

**Supplementary figure 4. | SARS-CoV-2 neutralization in COVID-19 patients.** Focus reduction (by 50%) neutralization titers (FRNT<sub>50</sub>) was determined by serial dilution of serum samples from COVID-19 patients taken at different times post onset of symptoms. RBD-IgG reactivity is indicated for each sample. FRNT<sub>50</sub> cutoff is indicated by dotted line and was set at 1:50 which was the lowest dilution tested. FRNT<sub>50</sub>-negative samples were assigned a titer of 1:20.

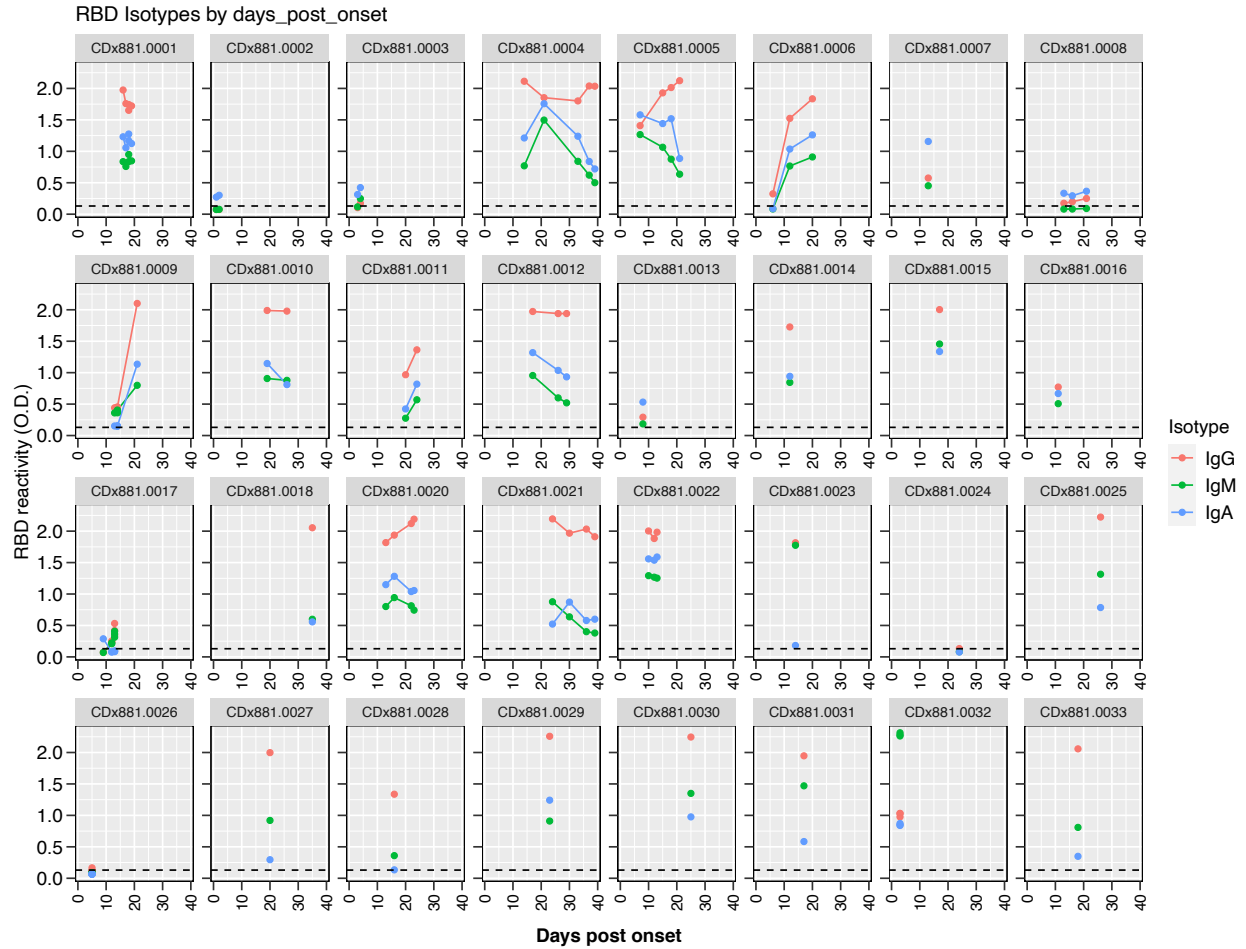

**Supplementary figure 5. | Spike IgG responses by antibody isotype in individual COVID-19 patients.** Serum was diluted 1:100 and tested for spike reactivity by ELISA and OD 405nm is shown.

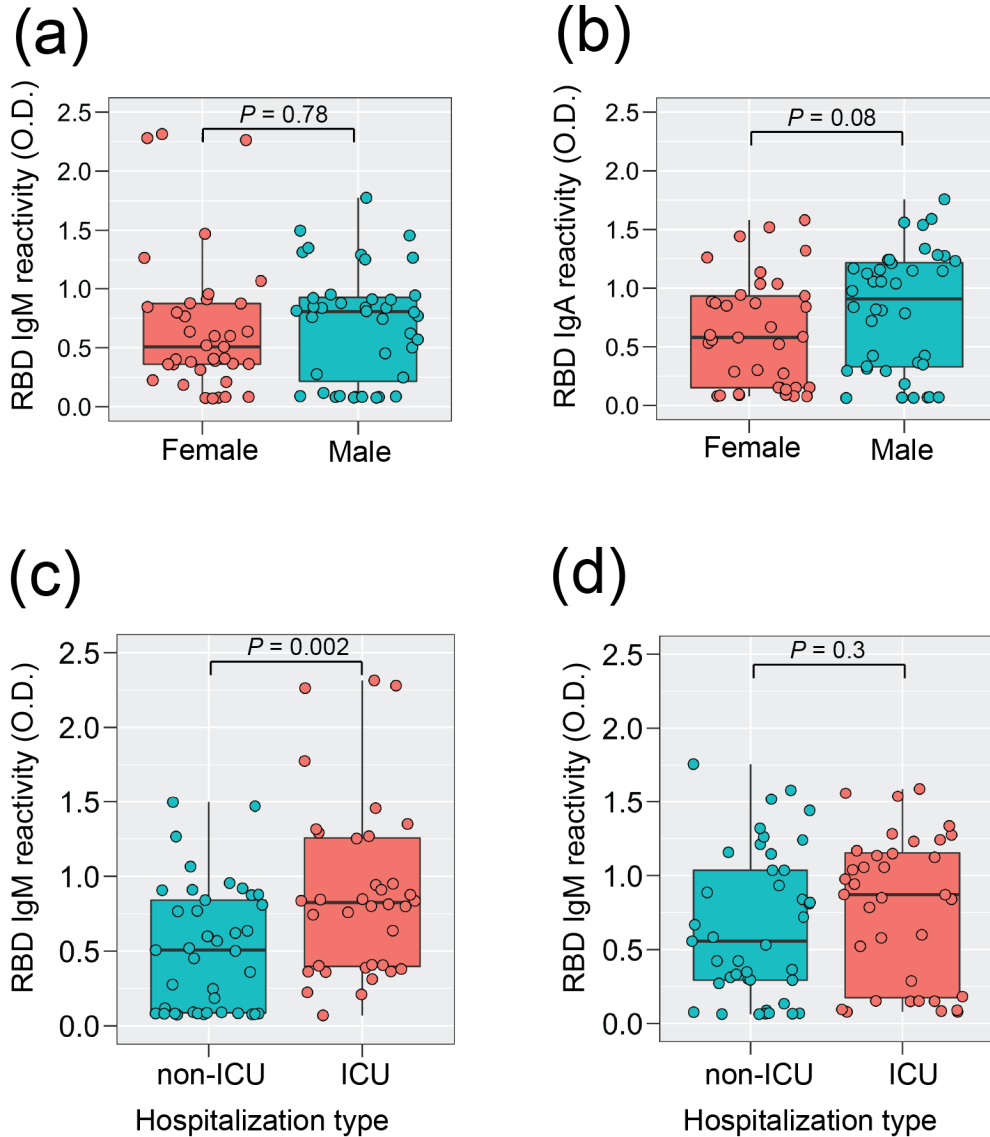

**Supplementary figure 6. | Anti-RBD-S IgM and IgA responses in COVID-19 patients by biological sex and hospitalization type.** Serum was diluted 1:100 and tested for RBD-S reactivity by ELISA and reactivities for IgM (**a, c**) and IgA (**b, d**) and plotted as a function of biological sex (**a, b**) and type of hospitalization (ICU or non-ICU, **c, d**). Boxplots show the median, 95% confidence level of OD 405nm from all individual samples. The Mann-Whitney  $U$ -test  $P$ -value is shown.
